# Supplementary material
Source: Elsevier journal article supplement (https://www.sciencedirect.com/science/article/pii/S0213911115000655)
Supplement: mmc1 [file S0213911115000655:mmc1.docx]

**Apéndice. Material adicional**

**Tabla I**

Selección de preguntas utilizadas para la creación de las dimensiones de precariedad **y** las categorías de cada pregunta

| **Dimensión** | **Variable** | **Pregunta** | **Categorías** |
| --- | --- | --- | --- |
| Temporalidad | Antigüedad en la empresa | P6B_3. ¿Cuánto tiempo hace que trabaja en la empresa actual? | 0. Más de 10 años  1. De más de 5 a 10 años 2. De más de 2 a 5 años 3. De 6 meses a 2 años  4. Menos de 6 meses |
|  | Duración del contrato | P7. ¿Cuál es su relación laboral con la empresa en la que trabaja? | 0. Permanente  1. Un año o más  2. Temporal indefinido  3. De 6 a 12 meses  4. Menos de 6 meses |
|  |  | P10. ¿Cuál es la duración del contrato temporal? |
| Salario | Salario | P66. ¿De media, cuál ha sido su salario neto mensual en los últimos 3 meses? | 0. Más de 2000 €  1. Entre 1501 y 2000 €  2. Entre 1001 y 1500 €  3. Entre 601 y 1000 €  4. 600 € o menos |
| Vulnerabilidad | Trato justo y discriminación en el trabajo | P36A. ¿Tiene miedo a reclamar mejores condiciones de trabajo? | 0. Nunca  1. Solo alguna vez  2. A veces  3. Muchas veces  4. Siempre |
|  |  | P36B. ¿Se siente indefenso ante el trato injusto de sus superiores? |
|  |  | P36C. ¿Tiene miedo de que le despidan si no hace lo que le piden, más allá de sus obligaciones contractuales? |
|  |  | P36D. ¿En su trabajo le tratan de forma discriminatoria e injusta? |
|  |  | P36E. ¿En su trabajo le tratan de forma autoritaria? |
|  |  | P36F. ¿En su trabajo le hacen sentir que usted es fácilmente reemplazable? |
| Ejercer derechos | Ejercer derechos | P23A. Tener vacaciones pagadas | 0. Nunca  1. Solo alguna vez  2. A veces  3. Muchas veces  4. Siempre |
|  |  | P23B. Disfrutar de los días de fiesta semanales |
|  |  | P23C. Coger baja por enfermedad cuando la necesita |
|  |  | P23D. Ir al médico cuando lo necesita |
|  |  | P23E. Disfrutar de las vacaciones cuando las pide |
|  |  | P23F. Pedir permisos por motivos personales |
